# Supplementary material for: Occupational Depression, Cognitive Performance, and Task Appreciation: A Study Based on Raven’s Advanced Progressive Matrices
Source: PubMed Central journal article supplement (PMC8488105; doi:10.3389/fpsyg.2021.695539), 2021-09-20
Supplement: Table_1.pdf [file Table_1.pdf]

**Supplemental Table 1.** Summary of hierarchical linear regression analysis—occupational depression predicting cognitive performance.

|                         | Cognitive performance |        |      |            |
|-------------------------|-----------------------|--------|------|------------|
|                         | $\beta$               | $t$    | $p$  | Adj. $R^2$ |
| Step 1                  |                       |        |      | .012       |
| Age                     | -0.049                | -1.796 | .073 |            |
| Sex                     | 0.109                 | 4.022  | .000 |            |
| Step 2                  |                       |        |      | .018       |
| Age                     | -0.044                | -1.631 | .103 |            |
| Sex                     | 0.109                 | 4.059  | .000 |            |
| Pretest mood            | -0.085                | -3.154 | .002 |            |
| Step 3                  |                       |        |      | .021       |
| Age                     | -0.049                | -1.817 | .069 |            |
| Sex                     | 0.104                 | 3.845  | .000 |            |
| Pretest mood            | -0.047                | -1.433 | .152 |            |
| Occupational depression | -0.066                | -1.999 | .046 |            |

*Notes.*  $N = 1,359$ . Regarding transient mood, higher scores are reflective of a more negative mood. No variance inflation factor exceeded 1.508, suggesting that multicollinearity was not an issue. Sex was coded 0 for women and 1 for men.
